# Supplementary material for: Sociodemographic characteristics determine download and use of a Corona contact tracing app in Germany—Results of the COSMO surveys
Source: PLOS journal article supplement (doi:10.1371/journal.pone.0256660), 2021-09-02
Supplement: S1 (10.1371/journal.pone.0256660.s001) [file journal.pone.0256660.s001]

## S1 File. Tables with supporting information

**Table 1.** Results of logistic regressions for the **univariate** association of variables with download of the Corona Warn App. Odds Ratios below 1 indicate a decreased probability of download as

| Variable                                                     | Odds Ratio [95% confidence interval] |
|--------------------------------------------------------------|--------------------------------------|
| Age (reference 65+)                                          |                                      |
| 18 to 39                                                     | 0.562 [0.468;0.676]                  |
| 40 to 64                                                     | 0.631 [0.526;0.758]                  |
| Net household income < 4000 Euro (reference >=4000)          | 0.469 [0.400;0.549]                  |
| Education (reference 10+ with higher entrance qualification) |                                      |
| Up to 9 years of schooling                                   | 0.597 [0.486;0.733]                  |
| At least 10 years without higher entrance qualification      | 0.688 [0.602;0.786]                  |
| Belonging to a minority group (reference not belonging)      | 0.724 [0.595;0.881]                  |
| Household language other than German (reference no)          | 0.825 [0.712;0.955]                  |
| Community size up to 20,000 inhabitants (reference > 20,000) | 0.795 [0.702;0.901]                  |
| Male gender (reference female)                               | 1.246 [1.104;1.406]                  |
| Chronic disease present (reference absent)                   | 1.151 [1.013;1.307]                  |
| Lives in one of the 10 western federal states or Berlin      | 2.386 [1.989;2.862]                  |
| Wave (reference wave 19)                                     |                                      |
| 15                                                           | 0.907 [0.746;1.104]                  |
| 16                                                           | 1.351 [1.115;1.637]                  |
| 17                                                           | 1.177 [0.971;1.428]                  |
| 18                                                           | 1.132 [0.934;1.371]                  |

compared to the reference group, odds ratios above 1 indicate increased probability.

**Table 2.** Results of logistic regression for the **multivariable** association of variables with download of the Corona Warn App. Wave has been included in the final models. Odds Ratios below 1 indicate a decreased probability of download as compared to the reference group, odds ratios above 1 indicate increased probability.

| Variable                                                     | Odds Ratio [95% confidence interval] |
|--------------------------------------------------------------|--------------------------------------|
| Age (reference 65+)                                          |                                      |
| 18 to 39                                                     | 0.473 [0.381;0.587]                  |
| 40 to 64                                                     | 0.563 [0.459;0.691]                  |
| Net household income < 4000 Euro (reference >=4000)          | 0.513 [0.433;0.608]                  |
| Education (reference 10+ with higher entrance qualification) |                                      |
| Up to 9 years of schooling                                   | 0.549 [0.434;0.695]                  |
| At least 10 years without higher entrance qualification      | 0.691 [0.592;0.806]                  |
| Belonging to a minority group (reference not belonging)      | 0.755 [0.606;0.941]                  |
| Household language other than German (reference no)          | 0.837 [0.71;0.988]                   |
| Community size up to 20,000 inhabitants (reference > 20,000) | 0.858 [0.746;0.988]                  |
| Male gender (reference female)                               | 1.159 [1.012;1.328]                  |
| Chronic disease present (reference absent)                   | 1.227 [1.058;1.422]                  |
| Lives in one of the 10 western federal states or Berlin      | 2.327 [1.909;2.836]                  |
| Wave (reference wave 19)                                     |                                      |
| 15                                                           | 0.939 [0.756;1.166]                  |
| 16                                                           | 1.417 [1.145;1.753]                  |
| 17                                                           | 1.231 [0.994;1.526]                  |
| 18                                                           | 1.105 [0.893;1.367]                  |

**Table 3.** Predictors of trust in data protection compliance of the Corona Warn App (n=868, wave 15); Odds Ratios > 1 indicate predictors of trust.

| Variable                                                     | Odds Ratio [95% confidence interval] |
|--------------------------------------------------------------|--------------------------------------|
| Age (reference 65+)                                          |                                      |
| 18 to 39                                                     | 0.544 [0.355;0.833]                  |
| 40 to 64                                                     | 0.611 [0.407;0.916]                  |
| Net household income < 4000 Euro (reference >=4000)          | 0.624 [0.434;0.896]                  |
| Education (reference 10+ with higher entrance qualification) |                                      |
| Up to 9 years of schooling                                   | 0.687 [0.434;1.087]                  |
| At least 10 years without higher entrance qualification      | 0.776 [0.571;1.055]                  |
| Belonging to a minority group (reference not belonging)      | 0.826 [0.504;1.352]                  |
| Household language other than German (reference no)          | 0.750 [0.543;1.036]                  |
| Community size up to 20,000 inhabitants (reference > 20,000) | 1.138 [0.854;1.515]                  |
| Male gender (reference female)                               | 1.105 [0.840;1.453]                  |
| Chronic disease present (reference absent)                   | 0.868 [0.643;1.172]                  |
| Lives in one of the 10 western federal states or Berlin      | 1.477 [1.019;2.139]                  |

**Table 4.** Predictors of willingness to disclose a positive test result via Corona Warn App (n=1511, waves 16 and 17).Odds Ratios > 1 indicate predictors of willingness to disclose.

| Variable                                                     | Odds Ratio [95% confidence interval] |
|--------------------------------------------------------------|--------------------------------------|
| Age (reference 65+)                                          |                                      |
| 18 to 39                                                     | 0.500 [0.336;0.744]                  |
| 40 to 64                                                     | 0.618 [0.422;0.905]                  |
| Net household income < 4000 Euro (reference >=4000)          | 0.577 [0.411;0.810]                  |
| Education (reference 10+ with higher entrance qualification) |                                      |
| Up to 9 years of schooling                                   | 0.395 [0.268;0.582]                  |
| At least 10 years without higher entrance qualification      | 0.482 [0.370;0.628]                  |
| Belonging to a minority group (reference not belonging)      | 0.684 [0.484;0.966]                  |
| Household language other than German (reference no)          | 0.727 [0.548;0.964]                  |
| Community size up to 20,000 inhabitants (reference > 20,000) | 0.961 [0.752;1.229]                  |
| Male gender (reference female)                               | 1.242 [0.978;1.576]                  |
| Chronic disease present (reference absent)                   | 1.103 [0.855;1.422]                  |
| Lives in one of the 10 western federal states or Berlin      | 1.472 [1.092;1.985]                  |
| Wave (16 vs 17)                                              | 1.079 [0.852;1.366]                  |

Table 5. Estimated regression coefficients, their standard error, p-values, and confidence intervals, measures of goodness of fit for the logistic model corresponding to Table 2

| Analysis of Maximum Likelihood Estimates                     |                                                         |    |          |                |                 |            |
|--------------------------------------------------------------|---------------------------------------------------------|----|----------|----------------|-----------------|------------|
| Parameter                                                    |                                                         | DF | Estimate | Standard Error | Wald Chi-Square | Pr > ChiSq |
| Intercept                                                    |                                                         | 1  | -0.5514  | 0.0842         | 42.8669         | <.0001     |
| Age (reference 65+)                                          | 18 to 39                                                | 1  | -0.3096  | 0.0530         | 34.1696         | <.0001     |
|                                                              | 40 to 64                                                | 1  | -0.1335  | 0.0491         | 7.3981          | 0.0065     |
| Net household income < 4000 Euro (reference >=4000)          |                                                         | 1  | -0.3330  | 0.0432         | 59.4034         | <.0001     |
| Education (reference 10+ with higher entrance qualification) | Up to 9 years of schooling                              | 1  | -0.2839  | 0.0765         | 13.7601         | 0.0002     |
|                                                              | At least 10 years without higher entrance qualification | 1  | -0.0403  | 0.0560         | 0.5186          | 0.4715     |
| Belonging to a minority group (reference not belonging)      |                                                         | 1  | -0.1308  | 0.0557         | 5.5107          | 0.0189     |
| Household language other than German (reference no)          |                                                         | 1  | -0.0938  | 0.0420         | 4.9906          | 0.0255     |
| Community size up to 20,000 inhabitants (reference > 20,000) |                                                         | 1  | -0.0755  | 0.0357         | 4.4614          | 0.0347     |
| Male gender (reference female)                               |                                                         | 1  | 0.0737   | 0.0345         | 4.5633          | 0.0327     |
| Chronic disease present (reference absent)                   |                                                         | 1  | 0.1051   | 0.0375         | 7.8352          | 0.0051     |
| Lives in one of the 10 western federal states or Berlin      |                                                         | 1  | 0.4209   | 0.0503         | 69.9300         | <.0001     |

| Model Fit Statistics |                |                          |
|----------------------|----------------|--------------------------|
| Criterion            | Intercept Only | Intercept and Covariates |
| AIC                  | 5157.462       | 4912.351                 |
| SC                   | 5163.698       | 4987.185                 |
| -2 Log L             | 5155.462       | 4888.351                 |

Table 6. Estimated regression coefficients, their standard error, p-values, and confidence intervals, measures of goodness of fit for the logistic model corresponding to Table 2

| Analysis of Maximum Likelihood Estimates                     |                                                         |    |          |                |                 |            |
|--------------------------------------------------------------|---------------------------------------------------------|----|----------|----------------|-----------------|------------|
| Parameter                                                    |                                                         | DF | Estimate | Standard Error | Wald Chi-Square | Pr > ChiSq |
| Intercept                                                    |                                                         | 1  | -0.5581  | 0.0846         | 43.5450         | <.0001     |
| Age (reference 65+)                                          | 18 to 39                                                | 1  | -0.3083  | 0.0531         | 33.6601         | <.0001     |
|                                                              | 40 to 64                                                | 1  | -0.1360  | 0.0492         | 7.6288          | 0.0057     |
| Net household income < 4000 Euro (reference >=4000)          |                                                         | 1  | -0.3342  | 0.0433         | 59.5272         | <.0001     |
| Education (reference 10+ with higher entrance qualification) | Up to 9 years of schooling                              | 1  | -0.2791  | 0.0768         | 13.2171         | 0.0003     |
|                                                              | At least 10 years without higher entrance qualification | 1  | -0.0449  | 0.0562         | 0.6377          | 0.4245     |
| Belonging to a minority group (reference not belonging)      |                                                         | 1  | -0.1383  | 0.0560         | 6.1043          | 0.0135     |
| Household language other than German (reference no)          |                                                         | 1  | -0.0899  | 0.0421         | 4.5511          | 0.0329     |
| Community size up to 20,000 inhabitants (reference > 20,000) |                                                         | 1  | -0.0748  | 0.0359         | 4.3515          | 0.0370     |
| Male gender (reference female)                               |                                                         | 1  | 0.0724   | 0.0346         | 4.3734          | 0.0365     |
| Chronic disease present (reference absent)                   |                                                         | 1  | 0.1014   | 0.0377         | 7.2556          | 0.0071     |
| Lives in one of the 10 western federal states or Berlin      |                                                         | 1  | 0.4238   | 0.0504         | 70.5952         | <.0001     |
| Wave (reference wave 19)                                     | 15                                                      | 1  | -0.1792  | 0.0692         | 6.7063          | 0.0096     |
|                                                              | 16                                                      | 1  | 0.2293   | 0.0677         | 11.4793         | 0.0007     |
|                                                              | 17                                                      | 1  | 0.0904   | 0.0683         | 1.7495          | 0.1859     |
|                                                              | 18                                                      | 1  | -0.0184  | 0.0676         | 0.0737          | 0.7860     |

| Model Fit Statistics |                |                          |
|----------------------|----------------|--------------------------|
| Criterion            | Intercept Only | Intercept and Covariates |
| AIC                  | 5157.462       | 4901.802                 |
| SC                   | 5163.698       | 5001.581                 |
| -2 Log L             | 5155.462       | 4869.802                 |

Table 7. Estimated regression coefficients, their standard error, p-values, and confidence intervals, measures of goodness of fit for the logistic model corresponding to Table 3 Trust

| Analysis of Maximum Likelihood Estimates                     |                                                         |    |          |                |                 |            |
|--------------------------------------------------------------|---------------------------------------------------------|----|----------|----------------|-----------------|------------|
| Parameter                                                    |                                                         | DF | Estimate | Standard Error | Wald Chi-Square | Pr > ChiSq |
| Intercept                                                    |                                                         | 1  | -0.0309  | 0.1706         | 0.0328          | 0.8563     |
| Age (reference 65+)                                          | 18 to 39                                                | 1  | -0.2418  | 0.1061         | 5.1937          | 0.0227     |
|                                                              | 40 to 64                                                | 1  | -0.1257  | 0.0984         | 1.6324          | 0.2014     |
| Net household income < 4000 Euro (reference >=4000)          |                                                         | 1  | -0.2359  | 0.0924         | 6.5208          | 0.0107     |
| Education (reference 10+ with higher entrance qualification) | Up to 9 years of schooling                              | 1  | -0.1660  | 0.1483         | 1.2527          | 0.2630     |
|                                                              | At least 10 years without higher entrance qualification | 1  | -0.0437  | 0.1090         | 0.1606          | 0.6886     |
| Belonging to a minority group (reference not belonging)      |                                                         | 1  | -0.0957  | 0.1258         | 0.5786          | 0.4469     |
| Household language other than German (reference no)          |                                                         | 1  | -0.1440  | 0.0824         | 3.0534          | 0.0806     |
| Community size up to 20,000 inhabitants (reference > 20,000) |                                                         | 1  | 0.0645   | 0.0731         | 0.7793          | 0.3774     |
| Male gender (reference female)                               |                                                         | 1  | 0.0499   | 0.0698         | 0.5105          | 0.4749     |
| Chronic disease present (reference absent)                   |                                                         | 1  | -0.0707  | 0.0766         | 0.8512          | 0.3562     |
| Lives in one of the 10 western federal states or Berlin      |                                                         | 1  | 0.1948   | 0.0946         | 4.2443          | 0.0394     |

| Model Fit Statistics |                |                          |
|----------------------|----------------|--------------------------|
| Criterion            | Intercept Only | Intercept and Covariates |
| AIC                  | 1203.270       | 1195.050                 |
| SC                   | 1208.037       | 1252.244                 |
| -2 Log L             | 1201.270       | 1171.050                 |

Table 8. Estimated regression coefficients, their standard error, p-values, and confidence intervals, measures of goodness of fit for the logistic model corresponding to Table 4 Disclosure

| Analysis of Maximum Likelihood Estimates                     |                                                         |    |          |                |                 |            |
|--------------------------------------------------------------|---------------------------------------------------------|----|----------|----------------|-----------------|------------|
| Parameter                                                    |                                                         | DF | Estimate | Standard Error | Wald Chi-Square | Pr > ChiSq |
| Intercept                                                    |                                                         | 1  | 0.7808   | 0.1417         | 30.3616         | <.0001     |
| Age (reference 65+)                                          | 18 to 39                                                | 1  | -0.3024  | 0.0950         | 10.1421         | 0.0014     |
|                                                              | 40 to 64                                                | 1  | -0.0890  | 0.0890         | 1.0016          | 0.3169     |
| Net household income < 4000 Euro (reference >=4000)          |                                                         | 1  | -0.2749  | 0.0865         | 10.0934         | 0.0015     |
| Education (reference 10+ with higher entrance qualification) | Up to 9 years of schooling                              | 1  | -0.3765  | 0.1232         | 9.3343          | 0.0022     |
|                                                              | At least 10 years without higher entrance qualification | 1  | -0.1764  | 0.0901         | 3.8319          | 0.0503     |
| Belonging to a minority group (reference not belonging)      |                                                         | 1  | -0.1900  | 0.0882         | 4.6357          | 0.0313     |
| Household language other than German (reference no)          |                                                         | 1  | -0.1594  | 0.0720         | 4.8931          | 0.0270     |
| Community size up to 20,000 inhabitants (reference > 20,000) |                                                         | 1  | -0.0198  | 0.0626         | 0.1003          | 0.7515     |
| Male gender (reference female)                               |                                                         | 1  | 0.1082   | 0.0608         | 3.1645          | 0.0753     |
| Chronic disease present (reference absent)                   |                                                         | 1  | 0.0488   | 0.0650         | 0.5646          | 0.4524     |
| Lives in one of the 10 western federal states or Berlin      |                                                         | 1  | 0.1934   | 0.0763         | 6.4252          | 0.0113     |
| Wave                                                         | 16 vs. 17                                               | 1  | 0.0380   | 0.0602         | 0.3982          | 0.5280     |

| Model Fit Statistics |                |                          |
|----------------------|----------------|--------------------------|
| Criterion            | Intercept Only | Intercept and Covariates |
| AIC                  | 1760.676       | 1696.030                 |
| SC                   | 1765.997       | 1765.197                 |
| -2 Log L             | 1758.676       | 1670.030                 |
